# Supplementary material
Source: MDPI journal article supplement (https://www.mdpi.com/2073-4344/12/5/520)
Supplement: s1 [file s1]

# Electrodeposition of a Li-Al Layered Double Hydroxide (LDH) on a Ball-Like Aluminum Lathe Waste Strips in Structured Catalytic Applications: Preparation and Characterization of Ni-Based LDH Catalysts for Hydrogen Evolution

Song-Hui Huang <sup>1</sup>, Yu-Jia Chen <sup>1</sup>, Wen-Fu Huang <sup>1</sup> and Jun-Yen Uan <sup>1,2,\*</sup>

<sup>1</sup> Department of Materials Science and Engineering, National Chung Hsing University, 145 Xingda Rd., Taichung 40227, Taiwan; d099066006@mail.nchu.edu.tw (S.-H.H.); t820207@gmail.com (Y.-J.C.); g106066012@mail.nchu.edu.tw (W.-F.H.)

<sup>2</sup> Innovation and Development Center of Sustainable Agriculture (IDCSA), National Chung Hsing University, 145 Xingda Rd., Taichung 40227, Taiwan

\* Correspondence: jyuan@dragon.nchu.edu.tw; Tel.: +886-422-840-500-401

**Citation:** Huang, S.-H.; Chen, Y.-J.; Huang, W.-F.; Uan, J.-Y. Electrodeposition of a Li-Al Layered Double Hydroxide (LDH) on a Ball-Like Aluminum Lathe Waste Strips in Structured Catalytic Applications: Preparation and Characterization of Ni-Based LDH Catalysts for Hydrogen Evolution. *Catalysts* **2022**, *12*, 520.

<https://doi.org/10.3390/catal12050520>

Academic Editors: Ioan-Cezar Marcu and Octavian Dumitru Pavel

Received: 10 March 2022

Accepted: 2 May 2022

Published: 5 May 2022

**Publisher's Note:** MDPI stays neutral with regard to jurisdictional claims in published maps and institutional affiliations.

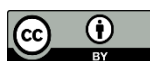

**Copyright:** © 2022 by the authors. Licensee MDPI, Basel, Switzerland. This article is an open access article distributed under the terms and conditions of the Creative Commons Attribution (CC BY) license (<http://creativecommons.org/licenses/by/4.0/>).

**Abstract:** A functionally structured catalyst was explored for ethanol steam reforming (ESR) to generate H<sub>2</sub>. Aluminum lathe waste strips were employed as the structured catalytic framework. The mixed metal oxide (Li-Al-O) was formed on the surface of Al lathe waste strips through calcination of the Li-Al-CO<sub>3</sub> layered double hydroxide (LDH), working as the support for the formation of Ni catalyst nanoparticles. NaOH and NaHCO<sub>3</sub> titration solutions were, respectively, used for adjusting the pH of the NiCl<sub>2</sub> aqueous solutions at 50 °C when developing the precursors of the Ni-based catalysts forming *in-situ* on the Li-Al-O oxide support. The Ni precursor on the Al structured framework was reduced in a H<sub>2</sub> atmosphere at 500 °C for 3 h, changing the hydroxide precursor into Ni nanoparticles. The titration agent (NaOH or NaHCO<sub>3</sub>) effectively affected the physical and chemical characterizations of the catalyst obtained by the different titrations. The ESR reaction catalyzed by the structured catalysts at a relatively low temperature of 500 °C was studied. The catalyst using NaHCO<sub>3</sub> titration presented good stability for generating H<sub>2</sub> during ESR, achieving a high rate of H<sub>2</sub> volume of about 122.9 L/(g<sub>cat</sub>·h). It also had a relatively low acidity on the surface of the Li-Al-O oxide support, leading to low activity for the dehydration of ethanol and high activity to H<sub>2</sub> yield. The interactions of catalysts between the Ni precursors and the Li-Al-O oxide supports were discussed in the processes of the H<sub>2</sub> reduction and the ESR reaction. Mechanisms of carbon formation during the ESR were proposed by the catalysts using NaOH and NaHCO<sub>3</sub> titration agents.

**Keywords:** structured catalyst; ethanol steam reforming; aluminum lathe waste strips; layered double hydroxide; Ni nanoparticle

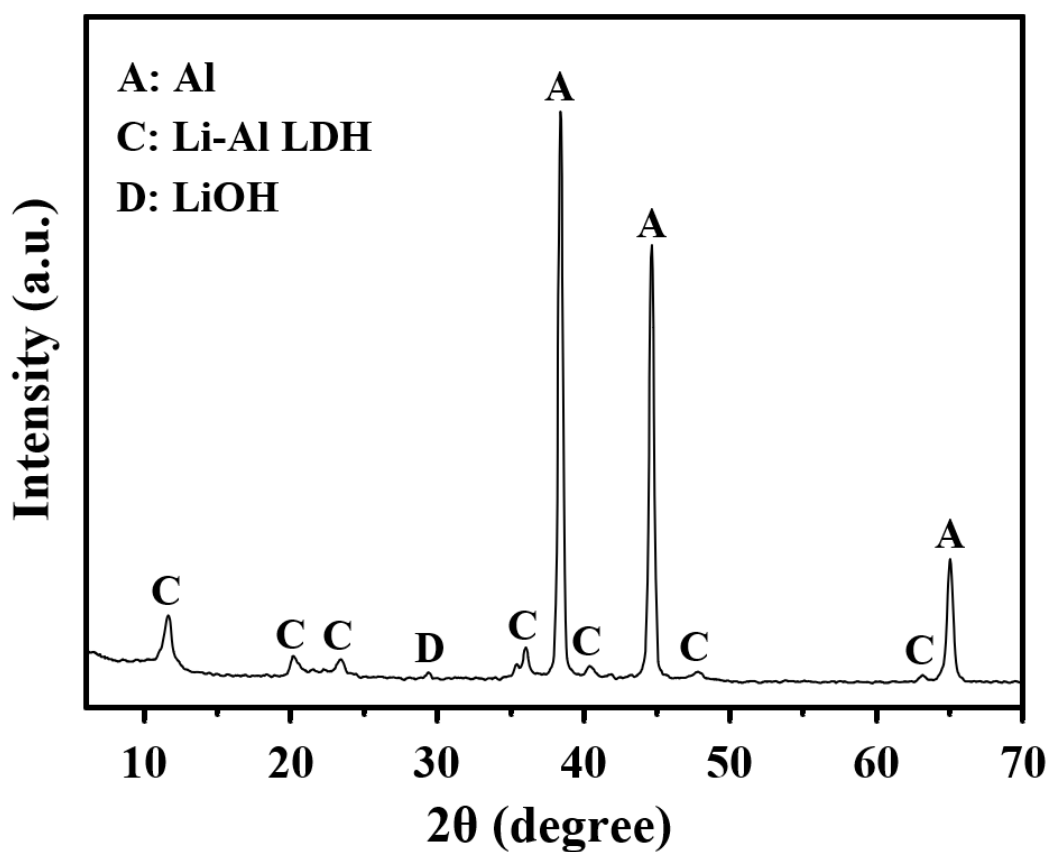

**Figure S1.** XRD pattern of the Li-Al LDH thin film on Al (A6061) substrate by electrochemical deposition.

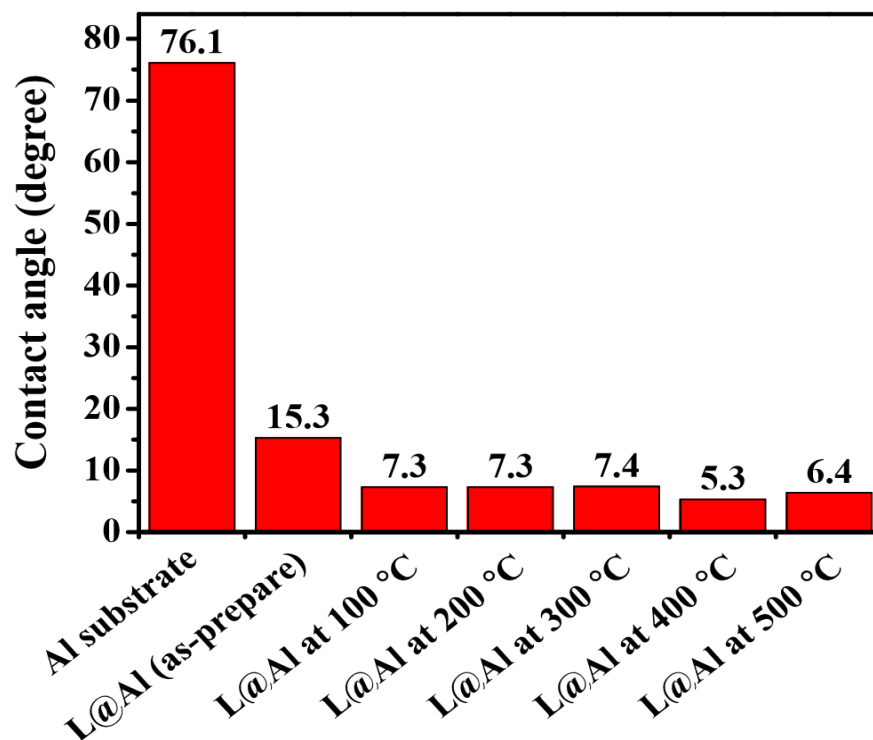

**Figure S2.** Water contact angle on the Al substrate, Li-Al LDH thin film @ Al substrate (L@Al), and Li-Al LDH thin film @ Al substrate (L@Al) after calcination at various temperatures.

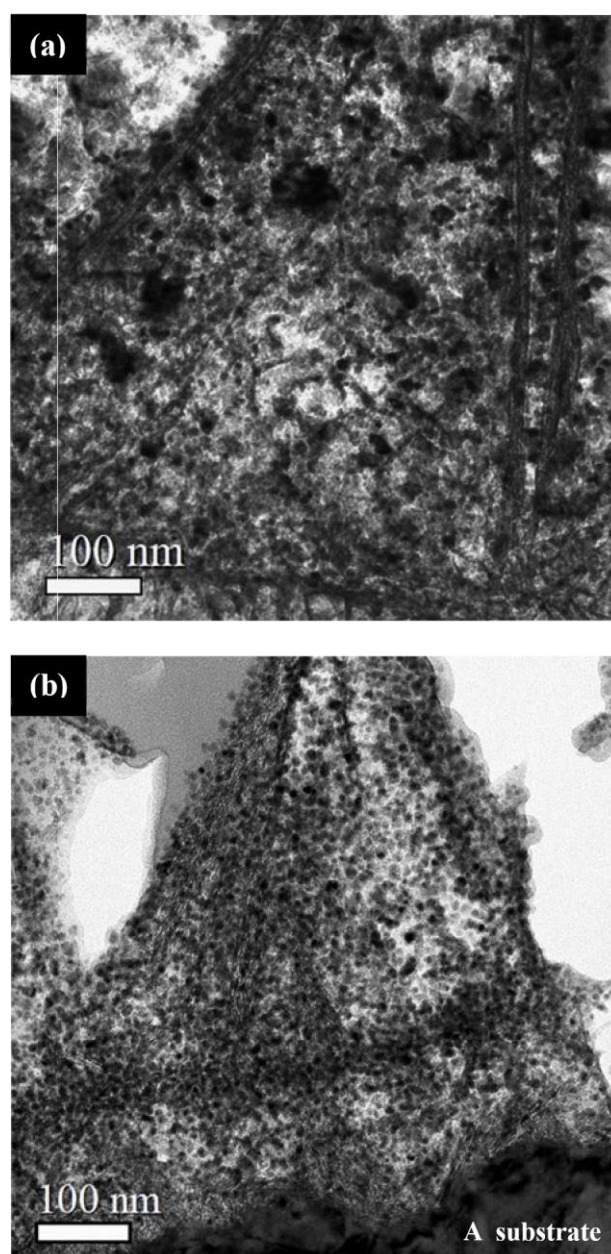

**Figure S3.** TEM bright-field images showed the distributions of Ni particles on the calcined LDH supports for the samples: (a) NaOH\_T + R and (b) NaHCO<sub>3</sub>\_T + R.
